# Supplementary material
Source: HighWire-hosted journal article supplement (https://erj.ersjournals.com/content/54/4/1900633)
Supplement: inline-supplementary-material-1 [file inline-supplementary-material-1.pdf]

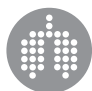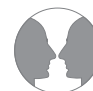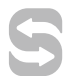

SHAREABLE PDF

# Blood eosinophil counts in COPD patients compared to controls

Umme Kolsum<sup>1</sup>, Thomas Southworth<sup>1,2</sup>, Natalie Jackson<sup>2</sup> and Dave Singh<sup>1,2</sup>

**Affiliations:** <sup>1</sup>The University of Manchester, Division of Infection, Immunity and Respiratory Medicine, School of Biological Sciences, Faculty of Biology, Medicine and Health, Manchester Academic Health Science Centre, Wythenshawe Hospital, Manchester University NHS Foundation Trust, Manchester, UK. <sup>2</sup>The Medicines Evaluation Unit, The Langley Building, Wythenshawe Hospital, Manchester, UK.

**Correspondence:** Umme Kolsum, The University of Manchester, Division of Infection, Immunity and Respiratory Medicine, School of Biological Sciences, Faculty of Biology, Medicine and Health, Manchester Academic Health Science Centre, Wythenshawe Hospital, Manchester University NHS Foundation Trust, Manchester, UK. E-mail: ukolsum@meu.org.uk

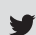

@ERSpublications

**Blood eosinophil counts are increased in COPD patients compared to healthy controls** <http://bit.ly/2ML6pzZ>

**Cite this article as:** Kolsum U, Southworth T, Jackson N, *et al.* Blood eosinophil counts in COPD patients compared to controls. *Eur Respir J* 2019; 54: 1900633 [<https://doi.org/10.1183/13993003.00633-2019>].

This single-page version can be shared freely online.

## *To the Editor:*

In patients with COPD, blood eosinophil counts can predict the effects of inhaled corticosteroids (ICS) on exacerbation rates [1–4]. Blood eosinophil counts are now recommended by the Global initiative for the management of Obstructive Lung Disease (GOLD) as a biomarker to help guide ICS use in clinical practice [5].
